# Supplementary material for: A monomeric bowl-like pyrogallol[4]arene Ti12 coordination complex
Source: Royal Society of Chemistry journal article supplement (doi:10.1039/c7cc05362b), 2017-01-01
Supplement: c7cc05362b1.pdf [file c7cc05362b1.pdf]

## Supporting Information

### Monomeric bowl-like pyrogallol[4]arene Ti<sub>12</sub> complex

Kongzhao Su,<sup>a</sup> Mingyan Wu,<sup>a</sup> Yanxi Tan,<sup>a</sup> Wenjing Wang,<sup>a,b</sup> Daqiang Yuan<sup>\*a</sup> and

Maochun Hong<sup>a</sup>

<sup>a</sup> State Key Laboratory of Structural Chemistry, Fujian Institute of Research on the Structure of Matter, Chinese Academy of Sciences, Fuzhou, 350002, China

<sup>b</sup> University of the Chinese Academy of Sciences, Beijing, 100049, China.

● Corresponding author:

E-mail: [ydq@fjirsm.ac.cn](mailto:ydq@fjirsm.ac.cn).

Tel: +86-591-63173104

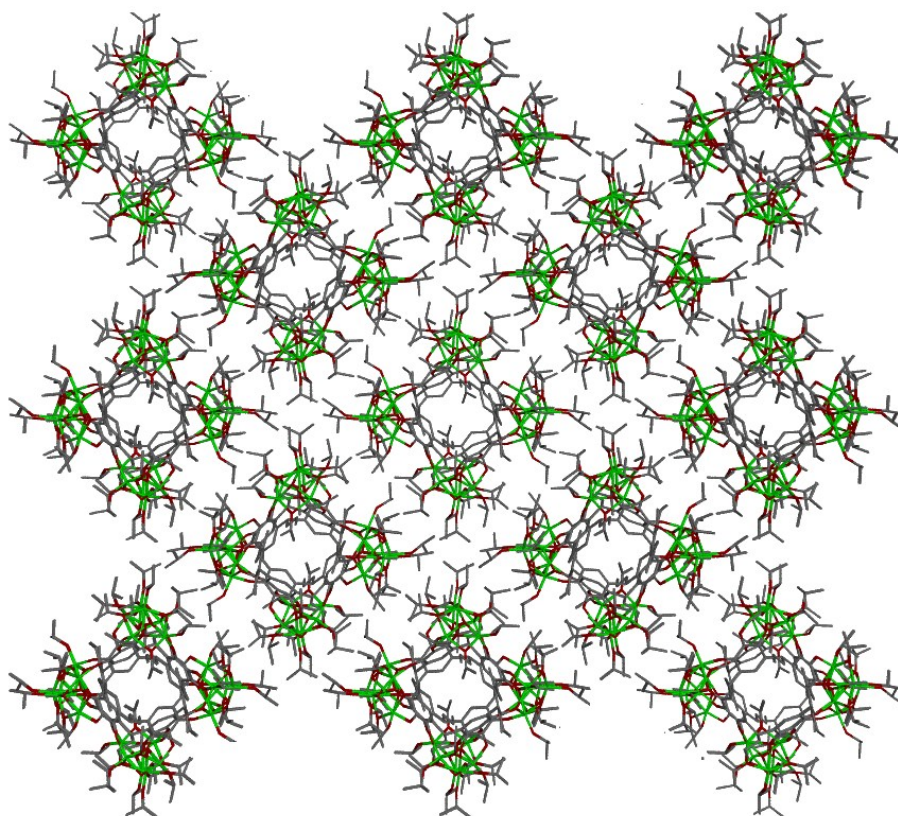

**Figure S1.** Extended structure of  $\text{Ti}_{12}\text{PgC}_3$  showing self-assembly into a skewed bilayer structure stacked by the  $\text{Ti}_{12}\text{PgC}_3$  clusters view along the a axis.

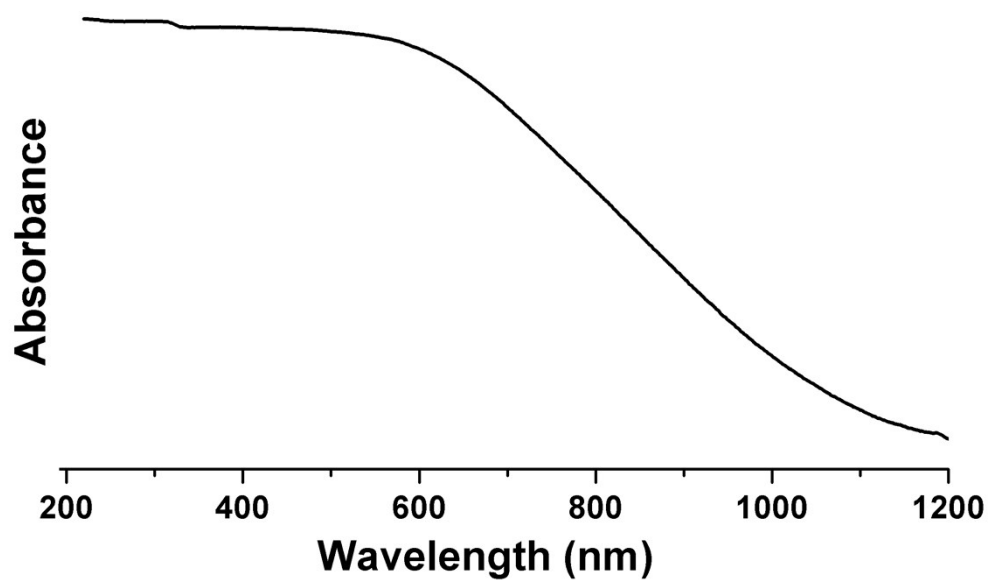

**Figure S2.** The solid-state absorption spectrum of  $\text{Ti}_{12}\text{PgC}_3$ .

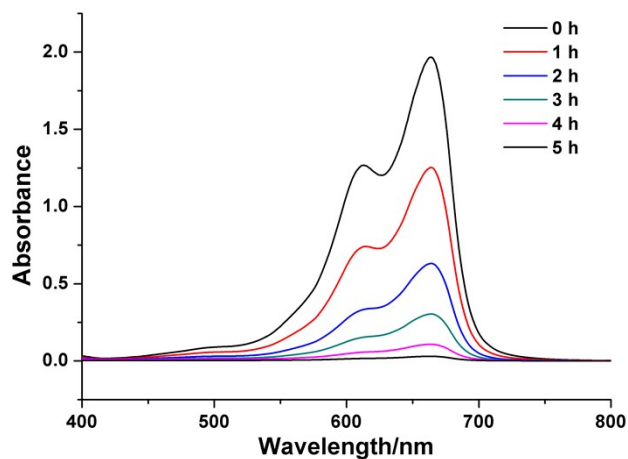

**Figure S3.** The temporal UV-Vis absorption spectrum changes of MB aqueous solutions for Ti<sub>12</sub>PgC<sub>3</sub>.

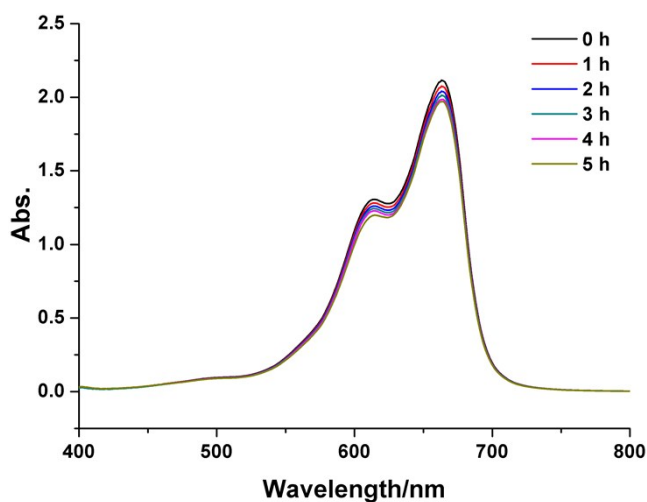

**Figure S4.** The temporal UV-Vis absorption spectrum changes of MB aqueous solutions for the blank experiment.

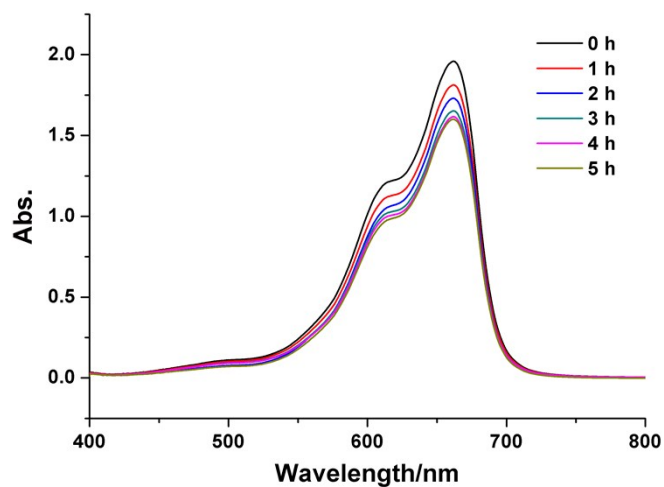

**Figure S5.** The temporal UV-Vis absorption spectrum changes of MB aqueous solutions for P25.
